# Supplementary material for: Ovarian Sensitivity Decreased Significantly in Patients With Insulin Resistance Undergoing in vitro Fertilization and Embryo Transfer
Source: Front Physiol. 2022 Mar 11;12:809419. doi: 10.3389/fphys.2021.809419 (PMC8963761; doi:10.3389/fphys.2021.809419)
Supplement: Supplementary file 1 [file Data_Sheet_1.xlsx]

## Sheet: PCOS-IR vs PCOS-N(Fig1-a)
IR	Non-IR
13.09	18.6667
6.08	15.1111
3.33	11.5556
10.53	6.66667
15.56	15.1724
17.04	32
6.29	16.8
4	11.8519
1.52	2.96296
22.86	9.69697
4.96	5.28302
1.67	2.61438
2.16	19.4872
10	1.69492
2.86	13.3333
5	6.42857
1.59	22.4
15.24	8.88889
7.22	3.44828
10.37	11.7829
8	19.0476
8.25	15.5556
32.32	14.4762
13.33	29.1892
30.48	9.77778
3.45	7.03704
24.76	12
9.52	22.2222
3.33	8
10	10
4.44	15
2.53	9.82456
12	5.92593
6.2	4.8
8.17	8.88889
10.67	16
15.07	25.3968
10.41	14.902
6.37	27.3171
5.16	25.5556
8.21	8.88889
4.85	16.6667
6.38	13.3333
5.83	22.1053
7.41	8.88889
16.67	13.7634
10.54	10.8333
10	5.51378
8.89	4.88889
3.81	7.27273
18.33	6.66667
7.33	5.33333
10.86	3.50877
10.83	18.5185
7.77	8
4.17	11.6364
14	6.66667
2.78	11.4286
1.37	4.67836
16.79	2.89855
4.95	13.3333
2.05	3.13725
8.94	3.33333
4.23	10
15	30
0.78	10.3704
12	5.7971
16	5.97701
14.55	16.2963
15.56	13.3333
4.76	3.4188
16.67	18.3133
8.89	10.3704
3.53	14.4444
6.67	11.25
10.98	5.83333
1.07	22.2222
15	21.5054
5.71	2
11.85	3.63636
16.23	3.18182
10	3.76068
6.67	10.7937
8.33	11.9298
19.05	10.4615
2.76	20
6.93	9.62963
11.85	34.4444
5.56	18.0952
7.78	5.18519
5.19	9.52381
8.57	1.73913
4.17	6.98413
16.41	17.5238
20.44	8.20513
1.71	4.88889
6.4	11.6667
2.79	5.55556
3.17	11.2821
8.48	6.95652
16.97	7.77778
20	7.71084
5.27	10.3704
6.42	4
18.18	6
16.62	6.41975
2.15	14.4444
2.4	6.34921
3.33	5.92593
4	11.954
7.36	6.66667
11.43	1.51515
1.09	5.92593
5.45	10.6667
3.76	2.88889
9.82	10.303
6.15	4.66667
7.78	4.07407
9.63	5.77778
16.19	7.05882
6.34	8.88889
5.71	8
14.69	4.44444
10.22	12.5
3.59	5.83333
9.85	8.88889
10	11.3333
1.95	10.3704
5.28	5.16129
21.33	3.01075
4.29	15.5556
5.92593	2.59259
9.90476	6.66667
20.4444	8.80734
14.3448	15.5556
11.8519	5
4.44444	7.5
4.63158	6.66667
2.7451	7.39496
21.3333	8.60215
11.7333	5.77778
3.76068	4
5	9.33333
5	4.28571
3.58974	2.96296
13.7143	29.1892
4.8227	3.41463
5.92593	29.6296
3.25581	11.0345
9.52381	15
16.3441	20.5128
21	8.88889
10.8333	8.51852
12.4444	14
15	5.33333
8.88889	3.23232
20.3922	10.4065
3.11111	13.3333
12.5	4.33333
10.8475	0.987654
13.0233	14.1667
12.7778	7.27273
9.52381	6.46465
11.3131	14.8331
9.09091	1.97531
2.85714	10
6.66667	6.15385
4.14815	6.66667
8.64865	9.62963
7.05882	8.88889
15.5556	9.16667
21.9048	8.88889
5.5914	8
3.93939	9.33333
7.03704	5.61404
12.5	11.4286
8.88889	15.873
1.95122	9.52381
4.54545	10.9804
6.66667	3.67816
7.90123	3.80952
18.3333	7.90123
2.66667	18.5859
5.5814	1.11111
10.7937
10.1587
4.16667
4.44444
10.5263
5.26316
5.86667
3.33333
5.51724
12.5926
8.88889
9.45455
2.82828
5.55556
18.4615
9.90476
4.66667
13.0081
5.86667
1.90476
2.10526
8.20513
3.05085
9.16667
11.1111
3.75
5.92593
12.2222
2.66667
6.06061
6.41975
5.51724
14.1667
3.9604
9.16667
4
15.8333
13.0612
8.57143
10.3704
5.33333
7.58621
3.93443
10.9091
2.04082
7.5
2.38095
2.46914
10.9091
4.84848
5.25253
20.202
15
10.5263
5.92593
8.33333
5.55556
13.3333
8.39506
4.65116
6
7.40741
7.22222
5.83333
11.3333
4.73118
13.5849
5.33333
1.33333
12.9412
3.80952
6.4
8.25397
10
6.37681
5.92593
4.36364
8.14815
2.67782
11.8519
4.84848
4.91228
6.66667
15.7265
7.61905
8.33333
5
11.8519
5.25253
5.41667
3.80952
18.3333
3.7037
5.2381
6.66667
6.66667
4.68085
11.1111
3.46154
3.75
15.5556
18
5.10638
11.4286
5.09091
5.92593
8.42105
8.27586
1.81818
24.1667
3.42857

## Sheet: Control-IR vs Control-N(Fig1-b)
Con-IR	Con-N
5.9259	5.3333
9.9048	3.5088
20.444	18.519
14.345	8
11.852	11.636
4.4444	6.6667
4.6316	11.429
2.7451	4.6784
21.333	2.8986
11.733	13.333
3.7607	3.1373
5	3.3333
5	10
3.5897	30
13.714	10.37
4.8227	5.7971
5.9259	5.977
3.2558	16.296
9.5238	13.333
16.344	3.4188
21	18.313
10.833	10.37
12.444	14.444
15	11.25
8.8889	5.8333
20.392	22.222
3.1111	21.505
12.5	2
10.847	3.6364
13.023	3.1818
12.778	3.7607
9.5238	10.794
11.313	11.93
9.0909	10.462
2.8571	20
6.6667	9.6296
4.1481	34.444
8.6486	18.095
7.0588	5.1852
15.556	9.5238
21.905	1.7391
5.5914	6.9841
3.9394	17.524
7.037	8.2051
12.5	4.8889
8.8889	11.667
1.9512	5.5556
4.5455	11.282
6.6667	6.9565
7.9012	7.7778
18.333	7.7108
2.6667	10.37
5.5814	4
10.794	6
10.159	6.4198
4.1667	14.444
4.4444	6.3492
10.526	5.9259
5.2632	11.954
5.8667	6.6667
3.3333	1.5152
5.5172	5.9259
12.593	10.667
8.8889	2.8889
9.4545	10.303
2.8283	4.6667
5.5556	4.0741
18.462	5.7778
9.9048	7.0588
4.6667	8.8889
13.008	8
5.8667	4.4444
1.9048	12.5
2.1053	5.8333
8.2051	8.8889
3.0508	11.333
9.1667	10.37
11.111	5.1613
3.75	3.0108
5.9259	15.556
12.222	2.5926
2.6667	6.6667
6.0606	8.8073
6.4198	15.556
5.5172	5
14.167	7.5
3.9604	6.6667
9.1667	7.395
4	8.6022
15.833	5.7778
13.061	4
8.5714	9.3333
10.37	4.2857
5.3333	2.963
7.5862	29.189
3.9344	3.4146
10.909	29.63
2.0408	11.034
7.5	15
2.381	20.513
2.4691	8.8889
10.909	8.5185
4.8485	14
5.2525	5.3333
20.202	3.2323
15	10.407
10.526	13.333
5.9259	4.3333
8.3333	0.9877
5.5556	14.167
13.333	7.2727
8.3951	6.4646
4.6512	14.833
6	1.9753
7.4074	10
7.2222	6.1538
5.8333	6.6667
11.333	9.6296
4.7312	8.8889
13.585	9.1667
5.3333	8.8889
1.3333	8
12.941	9.3333
3.8095	5.614
6.4	11.429
8.254	15.873
10	9.5238
6.3768	10.98
5.9259	3.6782
4.3636	3.8095
8.1481	7.9012
2.6778	18.586
11.852	1.1111
4.8485
4.9123
6.6667
15.726
7.619
8.3333
5
11.852
5.2525
5.4167
3.8095
18.333
3.7037
5.2381
6.6667
6.6667
4.6809
11.111
3.4615
3.75
15.556
18
5.1064
11.429
5.0909
5.9259
8.4211
8.2759
1.8182
24.167
3.4286

## Sheet: IR vs Non-IR(Fig 1-c)
IR	Non-IR
13.09	18.6667
6.08	15.1111
3.33	11.5556
10.53	6.66667
15.56	15.1724
17.04	32
6.29	16.8
4	11.8519
1.52	2.96296
22.86	9.69697
4.96	5.28302
1.67	2.61438
2.16	19.4872
10	1.69492
2.86	13.3333
5	6.42857
1.59	22.4
15.24	8.88889
7.22	3.44828
10.37	11.7829
8	19.0476
8.25	15.5556
32.32	14.4762
13.33	29.1892
30.48	9.77778
3.45	7.03704
24.76	12
9.52	22.2222
3.33	8
10	10
4.44	15
2.53	9.82456
12	5.92593
6.2	4.8
8.17	8.88889
10.67	16
15.07	25.3968
10.41	14.902
6.37	27.3171
5.16	25.5556
8.21	8.88889
4.85	16.6667
6.38	13.3333
5.83	22.1053
7.41	8.88889
16.67	13.7634
10.54	10.8333
10	5.51378
8.89	4.88889
3.81	7.27273
18.33	6.66667
7.33	5.33333
10.86	3.50877
10.83	18.5185
7.77	8
4.17	11.6364
14	6.66667
2.78	11.4286
1.37	4.67836
16.79	2.89855
4.95	13.3333
2.05	3.13725
8.94	3.33333
4.23	10
15	30
0.78	10.3704
12	5.7971
16	5.97701
14.55	16.2963
15.56	13.3333
4.76	3.4188
16.67	18.3133
8.89	10.3704
3.53	14.4444
6.67	11.25
10.98	5.83333
1.07	22.2222
15	21.5054
5.71	2
11.85	3.63636
16.23	3.18182
10	3.76068
6.67	10.7937
8.33	11.9298
19.05	10.4615
2.76	20
6.93	9.62963
11.85	34.4444
5.56	18.0952
7.78	5.18519
5.19	9.52381
8.57	1.73913
4.17	6.98413
16.41	17.5238
20.44	8.20513
1.71	4.88889
6.4	11.6667
2.79	5.55556
3.17	11.2821
8.48	6.95652
16.97	7.77778
20	7.71084
5.27	10.3704
6.42	4
18.18	6
16.62	6.41975
2.15	14.4444
2.4	6.34921
3.33	5.92593
4	11.954
7.36	6.66667
11.43	1.51515
1.09	5.92593
5.45	10.6667
3.76	2.88889
9.82	10.303
6.15	4.66667
7.78	4.07407
9.63	5.77778
16.19	7.05882
6.34	8.88889
5.71	8
14.69	4.44444
10.22	12.5
3.59	5.83333
9.85	8.88889
10	11.3333
1.95	10.3704
5.28	5.16129
21.33	3.01075
4.29	15.5556
5.92593	2.59259
9.90476	6.66667
20.4444	8.80734
14.3448	15.5556
11.8519	5
4.44444	7.5
4.63158	6.66667
2.7451	7.39496
21.3333	8.60215
11.7333	5.77778
3.76068	4
5	9.33333
5	4.28571
3.58974	2.96296
13.7143	29.1892
4.8227	3.41463
5.92593	29.6296
3.25581	11.0345
9.52381	15
16.3441	20.5128
21	8.88889
10.8333	8.51852
12.4444	14
15	5.33333
8.88889	3.23232
20.3922	10.4065
3.11111	13.3333
12.5	4.33333
10.8475	0.987654
13.0233	14.1667
12.7778	7.27273
9.52381	6.46465
11.3131	14.8331
9.09091	1.97531
2.85714	10
6.66667	6.15385
4.14815	6.66667
8.64865	9.62963
7.05882	8.88889
15.5556	9.16667
21.9048	8.88889
5.5914	8
3.93939	9.33333
7.03704	5.61404
12.5	11.4286
8.88889	15.873
1.95122	9.52381
4.54545	10.9804
6.66667	3.67816
7.90123	3.80952
18.3333	7.90123
2.66667	18.5859
5.5814	1.11111
10.7937
10.1587
4.16667
4.44444
10.5263
5.26316
5.86667
3.33333
5.51724
12.5926
8.88889
9.45455
2.82828
5.55556
18.4615
9.90476
4.66667
13.0081
5.86667
1.90476
2.10526
8.20513
3.05085
9.16667
11.1111
3.75
5.92593
12.2222
2.66667
6.06061
6.41975
5.51724
14.1667
3.9604
9.16667
4
15.8333
13.0612
8.57143
10.3704
5.33333
7.58621
3.93443
10.9091
2.04082
7.5
2.38095
2.46914
10.9091
4.84848
5.25253
20.202
15
10.5263
5.92593
8.33333
5.55556
13.3333
8.39506
4.65116
6
7.40741
7.22222
5.83333
11.3333
4.73118
13.5849
5.33333
1.33333
12.9412
3.80952
6.4
8.25397
10
6.37681
5.92593
4.36364
8.14815
2.67782
11.8519
4.84848
4.91228
6.66667
15.7265
7.61905
8.33333
5
11.8519
5.25253
5.41667
3.80952
18.3333
3.7037
5.2381
6.66667
6.66667
4.68085
11.1111
3.46154
3.75
15.5556
18
5.10638
11.4286
5.09091
5.92593
8.42105
8.27586
1.81818
24.1667
3.42857

## Sheet: PCOS vs Control(Fig1-d)
PCOS	Control
13.09	5.9259
6.08	9.9048
3.33	20.444
10.53	14.345
15.56	11.852
17.04	4.4444
6.29	4.6316
4	2.7451
1.52	21.333
22.86	11.733
4.96	3.7607
1.67	5
2.16	5
10	3.5897
2.86	13.714
5	4.8227
1.59	5.9259
15.24	3.2558
7.22	9.5238
10.37	16.344
8	21
8.25	10.833
32.32	12.444
13.33	15
30.48	8.8889
3.45	20.392
24.76	3.1111
9.52	12.5
3.33	10.847
10	13.023
4.44	12.778
2.53	9.5238
12	11.313
6.2	9.0909
8.17	2.8571
10.67	6.6667
15.07	4.1481
10.41	8.6486
6.37	7.0588
5.16	15.556
8.21	21.905
4.85	5.5914
6.38	3.9394
5.83	7.037
7.41	12.5
16.67	8.8889
10.54	1.9512
10	4.5455
8.89	6.6667
3.81	7.9012
18.33	18.333
7.33	2.6667
10.86	5.5814
10.83	10.794
7.77	10.159
4.17	4.1667
14	4.4444
2.78	10.526
1.37	5.2632
16.79	5.8667
4.95	3.3333
2.05	5.5172
8.94	12.593
4.23	8.8889
15	9.4545
0.78	2.8283
12	5.5556
16	18.462
14.55	9.9048
15.56	4.6667
4.76	13.008
16.67	5.8667
8.89	1.9048
3.53	2.1053
6.67	8.2051
10.98	3.0508
1.07	9.1667
15	11.111
5.71	3.75
11.85	5.9259
16.23	12.222
10	2.6667
6.67	6.0606
8.33	6.4198
19.05	5.5172
2.76	14.167
6.93	3.9604
11.85	9.1667
5.56	4
7.78	15.833
5.19	13.061
8.57	8.5714
4.17	10.37
16.41	5.3333
20.44	7.5862
1.71	3.9344
6.4	10.909
2.79	2.0408
3.17	7.5
8.48	2.381
16.97	2.4691
20	10.909
5.27	4.8485
6.42	5.2525
18.18	20.202
16.62	15
2.15	10.526
2.4	5.9259
3.33	8.3333
4	5.5556
7.36	13.333
11.43	8.3951
1.09	4.6512
5.45	6
3.76	7.4074
9.82	7.2222
6.15	5.8333
7.78	11.333
9.63	4.7312
16.19	13.585
6.34	5.3333
5.71	1.3333
14.69	12.941
10.22	3.8095
3.59	6.4
9.85	8.254
10	10
1.95	6.3768
5.28	5.9259
21.33	4.3636
4.29	8.1481
18.6667	2.6778
15.1111	11.852
11.5556	4.8485
6.66667	4.9123
15.1724	6.6667
32	15.726
16.8	7.619
11.8519	8.3333
2.96296	5
9.69697	11.852
5.28302	5.2525
2.61438	5.4167
19.4872	3.8095
1.69492	18.333
13.3333	3.7037
6.42857	5.2381
22.4	6.6667
8.88889	6.6667
3.44828	4.6809
11.7829	11.111
19.0476	3.4615
15.5556	3.75
14.4762	15.556
29.1892	18
9.77778	5.1064
7.03704	11.429
12	5.0909
22.2222	5.9259
8	8.4211
10	8.2759
15	1.8182
9.82456	24.167
5.92593	3.4286
4.8	5.3333
8.88889	3.5088
16	18.519
25.3968	8
14.902	11.636
27.3171	6.6667
25.5556	11.429
8.88889	4.6784
16.6667	2.8986
13.3333	13.333
22.1053	3.1373
8.88889	3.3333
13.7634	10
10.8333	30
5.51378	10.37
4.88889	5.7971
7.27273	5.977
6.66667	16.296
4.20091	13.333
	3.4188
	18.313
	10.37
	14.444
	11.25
	5.8333
	22.222
	21.505
	2
	3.6364
	3.1818
	3.7607
	10.794
	11.93
	10.462
	20
	9.6296
	34.444
	18.095
	5.1852
	9.5238
	1.7391
	6.9841
	17.524
	8.2051
	4.8889
	11.667
	5.5556
	11.282
	6.9565
	7.7778
	7.7108
	10.37
	4
	6
	6.4198
	14.444
	6.3492
	5.9259
	11.954
	6.6667
	1.5152
	5.9259
	10.667
	2.8889
	10.303
	4.6667
	4.0741
	5.7778
	7.0588
	8.8889
	8
	4.4444
	12.5
	5.8333
	8.8889
	11.333
	10.37
	5.1613
	3.0108
	15.556
	2.5926
	6.6667
	8.8073
	15.556
	5
	7.5
	6.6667
	7.395
	8.6022
	5.7778
	4
	9.3333
	4.2857
	2.963
	29.189
	3.4146
	29.63
	11.034
	15
	20.513
	8.8889
	8.5185
	14
	5.3333
	3.2323
	10.407
	13.333
	4.3333
	0.9877
	14.167
	7.2727
	6.4646
	14.833
	1.9753
	10
	6.1538
	6.6667
	9.6296
	8.8889
	9.1667
	8.8889
	8
	9.3333
	5.614
	11.429
	15.873
	9.5238
	10.98
	3.6782
	3.8095
	7.9012
	18.586
	1.1111
