# Supplementary material for: Ovarian Sensitivity Decreased Significantly in Patients With Insulin Resistance Undergoing in vitro Fertilization and Embryo Transfer
Source: Front Physiol. 2022 Mar 11;12:809419. doi: 10.3389/fphys.2021.809419 (PMC8963761; doi:10.3389/fphys.2021.809419)
Supplement: Supplementary file 3 [file Data_Sheet_3.xlsx]

## Sheet: Positive pregnancy(Fig3a)
Positive	Negative
13.09	0.62
6.08	6.2
3.33	8.28
10.53	6.38
17.04	18.33
6.29	7.77
4	4.17
1.52	2.78
22.86	1.37
4.96	0.78
2.16	14.55
10	15.56
2.86	6.67
5	1.07
1.59	5.71
15.24	10
7.22	6.67
10.37	2.76
8	5.27
8.25	2.15
32.32	8.42
13.33	2.4
30.48	4
6	3.76
3.45	7.78
24.76	5.71
9.52	3.59
3.33	1.95
10	3.76068
4.44	5
12	5.92593
13.33	3.25581
8.17	15
10.67	12.5
15.07	13.0233
10.41	2.85714
6.37	6.66667
5.16	7.05882
8.21	21.9048
4.85	3.93939
11.43	8.88889
7.41	2.66667
16.67	4.16667
10.54	5.26316
10	5.86667
8.89	5.33333
3.81	7.5
7.33	10.5263
10.86	5.55556
10.83	13.5849
6.36	5.33333
14	1.33333
16.79	4.73118
4.95	10
6.48	6.37681
2.05	5.92593
8.94	5.41667
4.23	3.7037
15	4.68085
6.73	3.75
12	18
16	8.42105
16.67	1.81818
8.89	3.42857
3.53	6.66667
10.98	1.69492
15	29.1892
2.5	22.2222
11.85	8.88889
16.23	7.27273
8.33	3.50877
1.46	11.6364
19.05	3.33333
6.93	5.18519
11.85	7.77778
5.56	6.66667
2.27	1.51515
7.78	4.66667
5.19	7.39496
8.57	0.987654
3.6	8.88889
4.17	10.9804
16.41	1.11111
3.33
20.44
1.71
6.4
2.79
3.17
8.48
16.97
20
6.42
18.18
16.62
3.33
7.36
11.43
1.09
5.45
9.82
6.15
9.63
6.34
14.69
10.22
9.85
10
5.28
21.33
5.92593
9.90476
20.4444
14.3448
11.8519
4.44444
4.63158
2.7451
21.3333
11.7333
15.5556
5
3.58974
13.7143
4.8227
9.52381
21
10.8333
12.4444
8.88889
20.3922
3.11111
10.8475
12.7778
9.52381
11.3131
9.09091
4.14815
8.64865
8.88889
15.5556
8.14815
5.5914
7.03704
12.5
1.95122
4.54545
6.66667
7.90123
18.3333
10.1587
4.44444
10.5263
5.86667
3.33333
5.51724
12.5926
8.88889
9.45455
2.82828
5.55556
18.4615
9.90476
4.66667
13.0081
1.90476
2.10526
8.20513
3.05085
9.16667
11.1111
3.75
5.92593
12.2222
2.66667
6.06061
6.41975
5.51724
14.1667
9.16667
4
15.8333
13.0612
8.57143
10.3704
7.58621
3.93443
10.9091
2.04082
2.38095
2.46914
9.36937
10.9091
4.84848
5.25253
20.202
15
5.92593
8.33333
13.3333
4.65116
6
7.40741
7.22222
5.83333
4.73118
12.9412
3.80952
6.4
8.25397
4.36364
8.14815
2.67782
11.8519
4.84848
4.91228
6.66667
15.7265
7.61905
8.33333
5
11.8519
17.2043
5.25253
0.711111
3.80952
18.3333
5.2381
6.66667
6.66667
11.1111
3.46154
15.5556
5.10638
11.4286
5.09091
5.92593
8.27586
24.1667
18.6667
15.1111
11.5556
15.1724
32
16.8
11.8519
2.96296
9.69697
5.28302
2.61438
19.4872
13.3333
6.42857
22.4
8.88889
3.44828
11.7829
19.0476
15.5556
14.4762
7.03704
12
8
10
15
9.82456
5.92593
4.8
16
25.3968
14.902
27.3171
25.5556
8.88889
16.6667
13.3333
22.1053
8.88889
13.7634
10.8333
5.51378
4.88889
6.66667
18.5185
8
6.66667
11.4286
4.67836
2.89855
13.3333
3.13725
10
30
10.3704
5.7971
5.97701
16.2963
13.3333
18.3133
10.3704
14.4444
11.25
5.83333
22.2222
21.5054
2
3.63636
3.18182
3.76068
10.7937
11.9298
10.4615
9.62963
34.4444
18.0952
9.52381
1.73913
6.98413
17.5238
8.20513
4.88889
11.6667
5.55556
11.2821
6.95652
7.71084
10.3704
4
6
6.41975
14.4444
6.34921
5.92593
11.954
5.92593
10.6667
2.88889
10.303
4.07407
5.77778
7.05882
8.88889
8
4.44444
12.5
5.83333
8.88889
11.3333
10.3704
5.16129
3.01075
15.5556
2.59259
6.66667
8.80734
15.5556
5
7.5
6.66667
8.60215
5.77778
4
9.33333
2.96296
3.41463
29.6296
11.0345
15
20.5128
8.88889
8.51852
14
5.33333
3.23232
10.4065
13.3333
4.33333
14.1667
7.27273
6.46465
14.8331
1.97531
10
6.15385
6.66667
9.62963
9.16667
8.88889
8
9.33333
5.61404
11.4286
15.873
9.52381
3.67816
3.80952
7.90123
18.5859

## Sheet: Clinical Pregnancy(Fig3b)
Positive	Negative
13.09	2.16
6.08	8.25
3.33	32.32
10.53	13.33
17.04	9.52
6.29	0.62
4	6.2
1.52	8.28
22.86	6.38
4.96	10.54
10	18.33
2.86	7.77
5	4.17
1.59	2.78
15.24	1.37
7.22	0.78
10.37	14.55
8	15.56
30.48	6.67
6	1.07
3.45	5.71
24.76	10
3.33	6.67
10	2.76
4.44	20
12	5.27
13.33	6.42
8.17	2.15
10.67	8.42
15.07	2.4
10.41	4
6.37	3.76
5.16	7.78
8.21	5.71
4.85	3.59
11.43	1.95
7.41	4.63158
16.67	2.7451
10	3.76068
8.89	5
3.81	15.5556
7.33	5.92593
10.86	3.25581
10.83	15
6.36	12.5
14	2.85714
16.79	6.66667
4.95	8.88889
6.48	7.05882
2.05	21.9048
8.94	3.93939
4.23	8.88889
15	2.66667
6.73	4.16667
12	5.26316
16	5.86667
16.67	8.20513
8.89	3.75
3.53	2.66667
10.98	5.51724
15	5.33333
2.5	10.9091
11.85	7.5
16.23	2.46914
8.33	10.5263
1.46	8.33333
19.05	5.55556
6.93	7.22222
11.85	13.5849
5.56	5.33333
2.27	1.33333
7.78	4.73118
5.19	3.80952
8.57	10
3.6	6.37681
4.17	5.92593
16.41	11.8519
3.33	7.61905
20.44	0.711111
1.71	5.41667
6.4	3.7037
2.79	6.66667
3.17	4.68085
8.48	3.75
16.97	15.5556
18.18	18
16.62	8.42105
3.33	1.81818
7.36	3.42857
11.43	6.66667
1.09	1.69492
5.45	13.3333
6.15	29.1892
9.63	22.2222
6.34	8
14.69	8.88889
10.22	7.27273
9.85	3.50877
10	11.6364
5.28	3.33333
21.33	2
5.92593	5.18519
9.90476	1.73913
20.4444	17.5238
14.3448	7.77778
11.8519	4
4.44444	6.66667
21.3333	1.51515
11.7333	10.6667
5	4.66667
3.58974	12.5
13.7143	7.39496
4.8227	0.987654
9.52381	8.88889
21	8.88889
10.8333	10.9804
12.4444	1.11111
8.88889
20.3922
3.11111
10.8475
12.7778
9.52381
11.3131
9.09091
4.14815
8.64865
15.5556
8.14815
5.5914
7.03704
12.5
1.95122
4.54545
6.66667
7.90123
18.3333
10.1587
4.44444
10.5263
5.86667
3.33333
5.51724
12.5926
8.88889
9.45455
2.82828
5.55556
18.4615
9.90476
4.66667
13.0081
1.90476
2.10526
3.05085
9.16667
11.1111
5.92593
12.2222
6.06061
6.41975
14.1667
9.16667
4
15.8333
13.0612
8.57143
10.3704
7.58621
3.93443
2.04082
2.38095
9.36937
10.9091
4.84848
5.25253
20.202
15
5.92593
13.3333
4.65116
6
7.40741
5.83333
4.73118
12.9412
6.4
8.25397
4.36364
8.14815
2.67782
4.84848
4.91228
6.66667
15.7265
8.33333
5
11.8519
17.2043
5.25253
3.80952
18.3333
5.2381
6.66667
11.1111
3.46154
5.10638
5.09091
5.92593
8.27586
24.1667
18.6667
15.1111
11.5556
15.1724
32
16.8
11.8519
2.96296
9.69697
5.28302
2.61438
19.4872
6.42857
22.4
8.88889
3.44828
11.7829
19.0476
15.5556
14.4762
7.03704
12
10
15
9.82456
5.92593
4.8
16
25.3968
14.902
27.3171
25.5556
8.88889
16.6667
13.3333
22.1053
8.88889
13.7634
10.8333
5.51378
4.88889
6.66667
18.5185
8
6.66667
11.4286
4.67836
2.89855
13.3333
3.13725
10
30
10.3704
5.7971
5.97701
16.2963
13.3333
18.3133
10.3704
14.4444
11.25
5.83333
22.2222
21.5054
3.63636
3.18182
3.76068
11.9298
10.4615
9.62963
34.4444
18.0952
9.52381
6.98413
8.20513
4.88889
11.6667
5.55556
11.2821
6.95652
7.71084
10.3704
6
6.41975
14.4444
6.34921
5.92593
11.954
5.92593
2.88889
10.303
4.07407
5.77778
7.05882
8.88889
8
4.44444
5.83333
8.88889
11.3333
10.3704
5.16129
3.01075
15.5556
2.59259
6.66667
8.80734
15.5556
5
7.5
6.66667
8.60215
5.77778
4
9.33333
2.96296
3.41463
29.6296
11.0345
15
20.5128
8.88889
8.51852
14
5.33333
3.23232
10.4065
13.3333
4.33333
14.1667
7.27273
6.46465
14.8331
1.97531
10
6.15385
6.66667
9.62963
9.16667
8
9.33333
5.61404
11.4286
15.873
9.52381
3.67816
3.80952
7.90123
18.5859

## Sheet: Fig3c
Positive pregnancy （+）	Positive pregnancy （-）
13.09	0.62
6.08	6.2
3.33	8.28
10.53	6.38
17.04	18.33
6.29	7.77
4	4.17
1.52	2.78
22.86	1.37
4.96	0.78
2.16	14.55
10	15.56
2.86	6.67
5	1.07
1.59	5.71
15.24	10
7.22	6.67
10.37	2.76
8	5.27
8.25	2.15
32.32	8.42
13.33	2.4
30.48	4
6	3.76
3.45	7.78
24.76	5.71
9.52	3.59
3.33	1.95
10	3.76068
4.44	5
12	5.92593
13.33	3.25581
8.17	15
10.67	12.5
15.07	13.0233
10.41	2.85714
6.37	6.66667
5.16	7.05882
8.21	21.9048
4.85	3.93939
11.43	8.88889
7.41	2.66667
16.67	4.16667
10.54	5.26316
10	5.86667
8.89	5.33333
3.81	7.5
7.33	10.5263
10.86	5.55556
10.83	13.5849
6.36	5.33333
14	1.33333
16.79	4.73118
4.95	10
6.48	6.37681
2.05	5.92593
8.94	5.41667
4.23	3.7037
15	4.68085
6.73	3.75
12	18
16	8.42105
16.67	1.81818
8.89	3.42857
3.53	6.66667
10.98	1.69492
15	29.1892
2.5	22.2222
11.85	8.88889
16.23	7.27273
8.33	3.50877
1.46	11.6364
19.05	3.33333
6.93	5.18519
11.85	7.77778
5.56	6.66667
2.27	1.51515
7.78	4.66667
5.19	7.39496
8.57	0.987654
3.6	8.88889
4.17	10.9804
16.41	1.11111
3.33	6.83677
20.44	5.23746
1.71
6.4
2.79
3.17
8.48
16.97
20
6.42
18.18
16.62
3.33
7.36
11.43
1.09
5.45
9.82
6.15
9.63
6.34
14.69
10.22
9.85
10
5.28
21.33
5.92593
9.90476
20.4444
14.3448
11.8519
4.44444
4.63158
2.7451
21.3333
11.7333
15.5556
5
3.58974
13.7143
4.8227
9.52381
21
10.8333
12.4444
8.88889
20.3922
3.11111
10.8475
12.7778
9.52381
11.3131
9.09091
4.14815
8.64865
8.88889
15.5556
8.14815
5.5914
7.03704
12.5
1.95122
4.54545
6.66667
7.90123
18.3333
10.1587
4.44444
10.5263
5.86667
3.33333
5.51724
12.5926
8.88889
9.45455
2.82828
5.55556
18.4615
9.90476
4.66667
13.0081
1.90476
2.10526
8.20513
3.05085
9.16667
11.1111
3.75
5.92593
12.2222
2.66667
6.06061
6.41975
5.51724
14.1667
9.16667
4
15.8333
13.0612
8.57143
10.3704
7.58621
3.93443
10.9091
2.04082
2.38095
2.46914
9.36937
10.9091
4.84848
5.25253
20.202
15
5.92593
8.33333
13.3333
4.65116
6
7.40741
7.22222
5.83333
4.73118
12.9412
3.80952
6.4
8.25397
4.36364
8.14815
2.67782
11.8519
4.84848
4.91228
6.66667
15.7265
7.61905
8.33333
5
11.8519
17.2043
5.25253
0.711111
3.80952
18.3333
5.2381
6.66667
6.66667
11.1111
3.46154
15.5556
5.10638
11.4286
5.09091
5.92593
8.27586
24.1667
18.6667
15.1111
11.5556
15.1724
32
16.8
11.8519
2.96296
9.69697
5.28302
2.61438
19.4872
13.3333
6.42857
22.4
8.88889
3.44828
11.7829
19.0476
15.5556
14.4762
7.03704
12
8
10
15
9.82456
5.92593
4.8
16
25.3968
14.902
27.3171
25.5556
8.88889
16.6667
13.3333
22.1053
8.88889
13.7634
10.8333
5.51378
4.88889
6.66667
18.5185
8
6.66667
11.4286
4.67836
2.89855
13.3333
3.13725
10
30
10.3704
5.7971
5.97701
16.2963
13.3333
18.3133
10.3704
14.4444
11.25
5.83333
22.2222
21.5054
2
3.63636
3.18182
3.76068
10.7937
11.9298
10.4615
9.62963
34.4444
18.0952
9.52381
1.73913
6.98413
17.5238
8.20513
4.88889
11.6667
5.55556
11.2821
6.95652
7.71084
10.3704
4
6
6.41975
14.4444
6.34921
5.92593
11.954
5.92593
10.6667
2.88889
10.303
4.07407
5.77778
7.05882
8.88889
8
4.44444
12.5
5.83333
8.88889
11.3333
10.3704
5.16129
3.01075
15.5556
2.59259
6.66667
8.80734
15.5556
5
7.5
6.66667
8.60215
5.77778
4
9.33333
2.96296
3.41463
29.6296
11.0345
15
20.5128
8.88889
8.51852
14
5.33333
3.23232
10.4065
13.3333
4.33333
14.1667
7.27273
6.46465
14.8331
1.97531
10
6.15385
6.66667
9.62963
9.16667
8.88889
8
9.33333
5.61404
11.4286
15.873
9.52381
3.67816
3.80952
7.90123
18.5859
9.60107
5.86041
8.01976e-05

## Sheet: Fig3d
Clinical pregnancy（+）	Clinical pregnancy（-）
13.09	2.16
6.08	8.25
3.33	32.32
10.53	13.33
17.04	9.52
6.29	0.62
4	6.2
1.52	8.28
22.86	6.38
4.96	10.54
10	18.33
2.86	7.77
5	4.17
1.59	2.78
15.24	1.37
7.22	0.78
10.37	14.55
8	15.56
30.48	6.67
6	1.07
3.45	5.71
24.76	10
3.33	6.67
10	2.76
4.44	20
12	5.27
13.33	6.42
8.17	2.15
10.67	8.42
15.07	2.4
10.41	4
6.37	3.76
5.16	7.78
8.21	5.71
4.85	3.59
11.43	1.95
7.41	4.63158
16.67	2.7451
10	3.76068
8.89	5
3.81	15.5556
7.33	5.92593
10.86	3.25581
10.83	15
6.36	12.5
14	2.85714
16.79	6.66667
4.95	8.88889
6.48	7.05882
2.05	21.9048
8.94	3.93939
4.23	8.88889
15	2.66667
6.73	4.16667
12	5.26316
16	5.86667
16.67	8.20513
8.89	3.75
3.53	2.66667
10.98	5.51724
15	5.33333
2.5	10.9091
11.85	7.5
16.23	2.46914
8.33	10.5263
1.46	8.33333
19.05	5.55556
6.93	7.22222
11.85	13.5849
5.56	5.33333
2.27	1.33333
7.78	4.73118
5.19	3.80952
8.57	10
3.6	6.37681
4.17	5.92593
16.41	11.8519
3.33	7.61905
20.44	0.711111
1.71	5.41667
6.4	3.7037
2.79	6.66667
3.17	4.68085
8.48	3.75
16.97	15.5556
18.18	18
16.62	8.42105
3.33	1.81818
7.36	3.42857
11.43	6.66667
1.09	1.69492
5.45	13.3333
6.15	29.1892
9.63	22.2222
6.34	8
14.69	8.88889
10.22	7.27273
9.85	3.50877
10	11.6364
5.28	3.33333
21.33	2
5.92593	5.18519
9.90476	1.73913
20.4444	17.5238
14.3448	7.77778
11.8519	4
4.44444	6.66667
21.3333	1.51515
11.7333	10.6667
5	4.66667
3.58974	12.5
13.7143	7.39496
4.8227	0.987654
9.52381	8.88889
21	8.88889
10.8333	10.9804
12.4444	1.11111
8.88889	7.37374
20.3922	5.62643
3.11111
10.8475
12.7778
9.52381
11.3131
9.09091
4.14815
8.64865
15.5556
8.14815
5.5914
7.03704
12.5
1.95122
4.54545
6.66667
7.90123
18.3333
10.1587
4.44444
10.5263
5.86667
3.33333
5.51724
12.5926
8.88889
9.45455
2.82828
5.55556
18.4615
9.90476
4.66667
13.0081
1.90476
2.10526
3.05085
9.16667
11.1111
5.92593
12.2222
6.06061
6.41975
14.1667
9.16667
4
15.8333
13.0612
8.57143
10.3704
7.58621
3.93443
2.04082
2.38095
9.36937
10.9091
4.84848
5.25253
20.202
15
5.92593
13.3333
4.65116
6
7.40741
5.83333
4.73118
12.9412
6.4
8.25397
4.36364
8.14815
2.67782
4.84848
4.91228
6.66667
15.7265
8.33333
5
11.8519
17.2043
5.25253
3.80952
18.3333
5.2381
6.66667
11.1111
3.46154
5.10638
5.09091
5.92593
8.27586
24.1667
18.6667
15.1111
11.5556
15.1724
32
16.8
11.8519
2.96296
9.69697
5.28302
2.61438
19.4872
6.42857
22.4
8.88889
3.44828
11.7829
19.0476
15.5556
14.4762
7.03704
12
10
15
9.82456
5.92593
4.8
16
25.3968
14.902
27.3171
25.5556
8.88889
16.6667
13.3333
22.1053
8.88889
13.7634
10.8333
5.51378
4.88889
6.66667
18.5185
8
6.66667
11.4286
4.67836
2.89855
13.3333
3.13725
10
30
10.3704
5.7971
5.97701
16.2963
13.3333
18.3133
10.3704
14.4444
11.25
5.83333
22.2222
21.5054
3.63636
3.18182
3.76068
11.9298
10.4615
9.62963
34.4444
18.0952
9.52381
6.98413
8.20513
4.88889
11.6667
5.55556
11.2821
6.95652
7.71084
10.3704
6
6.41975
14.4444
6.34921
5.92593
11.954
5.92593
2.88889
10.303
4.07407
5.77778
7.05882
8.88889
8
4.44444
5.83333
8.88889
11.3333
10.3704
5.16129
3.01075
15.5556
2.59259
6.66667
8.80734
15.5556
5
7.5
6.66667
8.60215
5.77778
4
9.33333
2.96296
3.41463
29.6296
11.0345
15
20.5128
8.88889
8.51852
14
5.33333
3.23232
10.4065
13.3333
4.33333
14.1667
7.27273
6.46465
14.8331
1.97531
10
6.15385
6.66667
9.62963
9.16667
8
9.33333
5.61404
11.4286
15.873
9.52381
3.67816
3.80952
7.90123
18.5859
9.66913
5.84086

## Sheet: COS protocol(Fig3e)
Standard long protocol	GnRH antagonist protocol
0.55	0.55
0.46	0.28
0.52	0.44
0.41	0.66
0.55	0.34
0.22	0.32
0.57	0.14
0.71	0.52
0.38	0.38
0.56	0.33
0.59	0.16
0.24	0.45
0.5	0.44
0.67	0.4
0.44	0.55
0.36	0.5
0.41	0.32
0.19	0.44
0.59	0.43
0.48	0.41
0.54	0.47
0.67	0.4
0.71	0.62
0.59	0.63
0.73	0.5
0.3	0.38
0.56	0.38
0.58	0.42
0.61	0.63
0.39	0.48
0.58	0.64
0.71	0.69
0.76	0.52
0.53	0.61
0.52	0.21
0.5	0.42
0.42	0.55
0.58	0.35
0.74	0.52
0.68	0.45
0.78	0.46
0.56	0.68
0.71	0.59
0.33	0.34
0.6	0.59
0.56	0.37
0.52	0.61
0.53	0.64
0.54	0.72
0.35	0.67
0.44	0.12
0.67	0.57
0.5	0.54
0.67	0.45
0.79	0.44
0.54	0.37
0.66	0.45
0.72	0.49
0.68	0.53
0.69	0.71
0.72	0.53
0.41	0.47
0.46	0.53
0.54	0.59
0.71	0.61
0.47	0.52
0.59	0.34
0.48	0.33
0.48	0.46
0.56	0.47
0.62	0.52
0.5	0.44
0.65	0.54
0.56	0.66
0.5	0.27
0.33	0.25
0.43	0.35
0.61	0.48
0.76	0.38
0.62	0.39
0.79	0.63
0.36	0.61
0.52	0.32
0.77	0.24
0.54	0.4
0.31	0.8
0.39	0.41
0.6	0.31
0.52	0.46
0.58	0.59
0.21	0.26
0.21	0.41
0.5	0.24
0.57	0.26
0.53	0.59
0.58	0.56
0.67	0.39
0.65	0.55
0.52	0.51
0.59	0.54
0.71	0.36
0.59	0.3
0.56	0.5
0.57	0.37
0.76	0.2
0.42	0.41
0.26	0.59
0.41	0.42
0.5	0.38
0.52	0.52
0.5	0.89
0.67	0.64
0.6	0.59
0.59	0.43
0.27	0.55
0.59	0.2
0.67	0.39
0.75	0.41
0.64	0.56
0.64	0.63
0.63	0.32
0.64	0.29
0.43	0.61
0.59	0.54
0.61	0.54
0.58	0.61
0.5	0.55
0.62	0.43
0.59	0.6
0.79	0.5
0.5	0.47
0.44	0.58
0.69	0.53
0.58	0.57
0.56	0.45
0.46	0.5
0.62	0.43
0.59	0.55
0.37	0.54
0.42	0.32
0.54	0.73
0.53	0.65
0.41	0.43
0.64	0.5
0.56	0.43
0.57
0.53
0.48
0.59
